# Supplementary material
Source: PubMed Central journal article supplement (PMC7233428)
Supplement: NIHMS1581953-supplement-2.pdf [file NIHMS1581953-supplement-2.pdf]

| Phenotype | SNP         | Chr | Position  | Nearest Gene  | Minor Allele | MAF  | P        | OR or Beta (95% CI)   |
|-----------|-------------|-----|-----------|---------------|--------------|------|----------|-----------------------|
| CI        | rs34095326  | 19  | 45395844  | TOMM40        | G            | 0.09 | 1.65E-07 | 1.68 (1.27 - 2.51)    |
| CI        | rs283815    | 19  | 45390333  | PVRL2         | A            | 0.24 | 9.69E-07 | 1.41 (1.18 - 1.75)    |
| CI        | rs71352238  | 19  | 45394336  | TOMM40        | T            | 0.12 | 1.97E-08 | 1.65 (1.28 - 2.32)    |
| CI        | rs10414043  | 19  | 45415713  | APOC1         | G            | 0.12 | 9.84E-07 | 1.53 (1.21 - 2.07)    |
| CI        | rs111789331 | 19  | 45427125  | APOC1P1       | T            | 0.12 | 6.87E-09 | 1.75 (1.32 - 2.62)    |
| CI        | rs112961612 | 20  | 40500666  | RP5-1121H13.4 | T            | 0.08 | 7.90E-08 | 1.78 (1.29 - 2.84)    |
| CI        | rs11556505  | 19  | 45396144  | TOMM40        | C            | 0.13 | 4.72E-08 | 1.58 (1.26 - 2.14)    |
| CI        | rs117529438 | 12  | 65372996  | RP11-766N7.4  | C            | 0.05 | 2.34E-07 | 1.95 (1.31 - 3.84)    |
| CI        | rs12721046  | 19  | 45421254  | APOC1         | G            | 0.12 | 7.10E-10 | 1.78 (1.34 - 2.63)    |
| CI        | rs12721051  | 19  | 45422160  | APOC1         | C            | 0.15 | 7.15E-12 | 1.79 (1.38 - 2.54)    |
| CI        | rs12972156  | 19  | 45387459  | PVRL2         | C            | 0.13 | 1.83E-09 | 1.72 (1.32 - 2.47)    |
| CI        | rs12972970  | 19  | 45387596  | PVRL2         | G            | 0.13 | 1.85E-09 | 1.72 (1.32 - 2.46)    |
| CI        | rs184017    | 19  | 45394969  | TOMM40        | T            | 0.24 | 1.59E-07 | 1.45 (1.21 - 1.82)    |
| CI        | rs2075650   | 19  | 45395619  | TOMM40        | A            | 0.13 | 6.86E-08 | 1.57 (1.25 - 2.11)    |
| CI        | rs283811    | 19  | 45388500  | PVRL2         | A            | 0.23 | 4.95E-07 | 1.45 (1.20 - 1.83)    |
| CI        | rs283812    | 19  | 45388568  | PVRL2         | T            | 0.21 | 1.02E-07 | 1.50 (1.23 - 1.94)    |
| CI        | rs34342646  | 19  | 45388130  | PVRL2         | G            | 0.13 | 2.02E-09 | 1.71 (1.32 - 2.45)    |
| CI        | rs34404554  | 19  | 45395909  | TOMM40        | C            | 0.13 | 1.18E-08 | 1.62 (1.28 - 2.21)    |
| CI        | rs429358    | 19  | 45411941  | APOE          | T            | 0.14 | 5.47E-11 | 1.69 (1.34 - 2.31)    |
| CI        | rs4420638   | 19  | 45422946  | APOC1         | A            | 0.16 | 9.06E-09 | 1.59 (1.27 - 2.11)    |
| CI        | rs4459914   | 3   | 175333898 | NAALADL2      | G            | 0.28 | 3.19E-07 | 1.43 (1.29 - 1.56)    |
| CI        | rs4539947   | 3   | 175333737 | NAALADL2      | C            | 0.29 | 5.92E-07 | 1.41 (1.28 - 1.55)    |
| CI        | rs4597721   | 3   | 175322440 | NAALADL2      | T            | 0.24 | 8.71E-07 | 1.41 (1.27 - 1.55)    |
| CI        | rs56131196  | 19  | 45422846  | APOC1         | G            | 0.16 | 7.94E-09 | 1.59 (1.27 - 2.12)    |
| CI        | rs59007384  | 19  | 45396665  | TOMM40        | G            | 0.22 | 5.75E-07 | 1.43 (1.19 - 1.80)    |
| CI        | rs66626994  | 19  | 45428234  | APOC1P1       | G            | 0.13 | 8.92E-07 | 1.59 (1.23 - 2.24)    |
| CI        | rs6857      | 19  | 45392254  | PVRL2         | C            | 0.14 | 3.75E-12 | 1.79 (1.38 - 2.53)    |
| CI        | rs73052335  | 19  | 45420082  | APOC1         | A            | 0.10 | 8.97E-12 | 1.94 (1.42 - 3.06)    |
| CI        | rs7512924   | 1   | 246184603 | SMYD3         | T            | 0.21 | 1.65E-08 | 1.49 (1.24 - 1.89)    |
| CI        | rs769449    | 19  | 45410002  | APOE          | G            | 0.10 | 3.51E-11 | 1.87 (1.39 - 2.85)    |
| CRP       | rs79551159  | 1   | 159647188 | CRPP1         | G            | 0.06 | 7.75E-07 | -1.37 (-2.27 - -0.98) |
| CRP       | rs10036128  | 5   | 6937182   | RP11-122F24.1 | C            | 0.09 | 8.97E-07 | 0.61 (0.36 - 0.85)    |
| CRP       | rs55893384  | 7   | 4902702   | RADIL         | C            | 0.11 | 8.61E-07 | -1.92 (-3.19 - -1.37) |
| CRP       | rs77600238  | 7   | 4897911   | RADIL         | G            | 0.10 | 7.53E-07 | -1.88 (-3.11 - -1.34) |
| CRP       | rs10235512  | 7   | 4905055   | RADIL         | T            | 0.09 | 1.40E-07 | -1.64 (-2.62 - -1.20) |

| Phenotype | SNP         | Chr | Position  | Nearest Gene | Minor Allele | MAF  | P        | OR or Beta (95% CI)   |
|-----------|-------------|-----|-----------|--------------|--------------|------|----------|-----------------------|
| CRP       | rs113314021 | 7   | 151590920 | RNU6-604P    | G            | 0.05 | 2.00E-07 | -1.20 (-1.92 - -0.87) |
| CRP       | rs111900653 | 8   | 74198470  | RPL7         | C            | 0.07 | 7.75E-07 | -1.56 (-2.59 - -1.12) |
| CRP       | rs429358    | 19  | 45411941  | APOE         | T            | 0.14 | 2.38E-07 | 2.00 (1.45 - 3.22)    |
| CRP       | rs6857      | 19  | 45392254  | PVRL2        | C            | 0.16 | 1.95E-07 | 2.10 (1.53 - 3.37)    |
| CRP       | rs117246187 | 20  | 49306934  | FAM65C       | A            | 0.07 | 8.63E-07 | -1.57 (-2.61 - -1.12) |
| CRP       | rs9608227   | 22  | 24370194  | AP000351.9   | T            | 0.10 | 1.74E-07 | -1.35 (-2.17 - -0.98) |
| HDL       | rs80302977  | 8   | 19934339  | AC100802.3   | T            | 0.08 | 9.08E-07 | -0.36 (-0.60 - -0.26) |
| HDL       | rs7015766   | 8   | 19939049  | AC100802.3   | C            | 0.07 | 1.45E-07 | -0.30 (-0.49 - -0.22) |
| HDL       | rs7203984   | 16  | 56999258  | CETP         | A            | 0.20 | 8.55E-08 | 0.49 (0.36 - 0.77)    |
| HDL       | rs708272    | 16  | 56996288  | CETP         | G            | 0.43 | 3.49E-10 | -0.52 (-0.75 - -0.40) |
| HDL       | rs1532625   | 16  | 57005301  | CETP         | C            | 0.44 | 5.40E-11 | -0.50 (-0.71 - -0.38) |
| HDL       | rs12720922  | 16  | 57000885  | CETP         | G            | 0.18 | 2.40E-08 | 0.46 (0.34 - 0.70)    |
| HDL       | rs11508026  | 16  | 56999328  | CETP         | C            | 0.43 | 1.21E-10 | -0.50 (-0.72 - -0.39) |
| HDL       | rs7499892   | 16  | 57006590  | CETP         | C            | 0.18 | 2.41E-10 | 0.40 (0.31 - 0.58)    |
| HDL       | rs12448528  | 16  | 56985555  | AC012181.1   | G            | 0.22 | 1.61E-07 | -1.90 (-2.61 - -1.19) |
| HDL       | rs11076176  | 16  | 57007446  | CETP         | T            | 0.18 | 5.71E-10 | 0.41 (0.31 - 0.60)    |
| HDL       | rs183130    | 16  | 56991363  | AC012181.1   | C            | 0.32 | 9.61E-14 | -0.42 (-0.57 - -0.33) |
| HDL       | rs9989419   | 16  | 56985139  | AC012181.1   | G            | 0.39 | 3.28E-08 | -1.69 (-2.29 - -1.09) |
| HDL       | rs11076175  | 16  | 57006378  | CETP         | A            | 0.18 | 5.90E-10 | 0.41 (0.31 - 0.60)    |
| HDL       | rs12149545  | 16  | 56993161  | AC012181.1   | G            | 0.31 | 3.21E-12 | -0.44 (-0.61 - -0.34) |
| HDL       | rs12444012  | 16  | 57001438  | CETP         | G            | 0.43 | 1.87E-10 | -0.51 (-0.73 - -0.39) |
| HDL       | rs12446515  | 16  | 56987015  | AC012181.1   | C            | 0.33 | 9.89E-13 | -0.43 (-0.59 - -0.33) |
| HDL       | rs12720926  | 16  | 56998918  | CETP         | A            | 0.40 | 1.27E-09 | -0.52 (-0.77 - -0.39) |
| HDL       | rs12923459  | 16  | 56989830  | AC012181.1   | G            | 0.44 | 4.46E-07 | 0.66 (0.47 - 1.07)    |
| HDL       | rs1532624   | 16  | 57005479  | CETP         | C            | 0.44 | 4.01E-11 | -0.49 (-0.70 - -0.38) |
| HDL       | rs17231506  | 16  | 56994528  | CETP         | C            | 0.32 | 1.33E-12 | -0.44 (-0.60 - -0.34) |
| HDL       | rs173539    | 16  | 56988044  | AC012181.1   | C            | 0.33 | 3.59E-13 | -0.42 (-0.58 - -0.33) |
| HDL       | rs1800775   | 16  | 56995236  | CETP         | C            | 0.49 | 2.96E-11 | -0.49 (-0.70 - -0.38) |
| HDL       | rs1864163   | 16  | 56997233  | CETP         | G            | 0.26 | 4.29E-10 | 0.47 (0.35 - 0.68)    |
| HDL       | rs247616    | 16  | 56989590  | AC012181.1   | C            | 0.32 | 1.09E-13 | -0.41 (-0.56 - -0.33) |
| HDL       | rs247617    | 16  | 56990716  | AC012181.1   | C            | 0.32 | 1.08E-13 | -0.42 (-0.57 - -0.33) |
| HDL       | rs289713    | 16  | 57006829  | CETP         | A            | 0.19 | 1.02E-08 | -2.23 (-2.99 - -1.47) |
| HDL       | rs289714    | 16  | 57007451  | CETP         | A            | 0.19 | 2.08E-08 | -2.17 (-2.93 - -1.41) |
| HDL       | rs3024665   | 16  | 27371539  | IL4R         | T            | 0.07 | 8.18E-07 | 3.05 (1.84 - 4.26)    |
| HDL       | rs3764261   | 16  | 56993324  | AC012181.1   | C            | 0.32 | 3.91E-13 | -0.43 (-0.59 - -0.34) |

| Phenotype | SNP         | Chr | Position  | Nearest Gene  | Minor Allele | MAF  | P        | OR or Beta (95% CI)   |
|-----------|-------------|-----|-----------|---------------|--------------|------|----------|-----------------------|
| HDL       | rs3816117   | 16  | 56996158  | CETP          | T            | 0.49 | 1.73E-11 | -0.49 (-0.69 - -0.38) |
| HDL       | rs4784741   | 16  | 57001216  | CETP          | C            | 0.43 | 1.58E-10 | -0.51 (-0.73 - -0.39) |
| HDL       | rs56156922  | 16  | 56987369  | AC012181.1    | T            | 0.33 | 9.22E-13 | -0.43 (-0.59 - -0.33) |
| HDL       | rs56228609  | 16  | 56987765  | AC012181.1    | C            | 0.32 | 3.00E-12 | -0.43 (-0.60 - -0.34) |
| HDL       | rs711751    | 16  | 56993909  | CETP          | C            | 0.45 | 1.71E-07 | -1.63 (-2.24 - -1.02) |
| HDL       | rs711752    | 16  | 56996211  | CETP          | G            | 0.43 | 3.93E-10 | -0.52 (-0.76 - -0.40) |
| HDL       | rs7203286   | 16  | 56986762  | AC012181.1    | G            | 0.45 | 8.02E-07 | 0.66 (0.47 - 1.09)    |
| HDL       | rs7205804   | 16  | 57004889  | CETP          | G            | 0.44 | 3.75E-11 | -0.49 (-0.70 - -0.38) |
| HDL       | rs72786786  | 16  | 56985514  | AC012181.1    | G            | 0.33 | 7.20E-11 | -0.45 (-0.65 - -0.35) |
| HDL       | rs8045855   | 16  | 57000696  | CETP          | T            | 0.19 | 2.41E-07 | 0.49 (0.35 - 0.78)    |
| HDL       | rs821840    | 16  | 56993886  | CETP          | A            | 0.28 | 4.68E-12 | -0.41 (-0.58 - -0.32) |
| HDL       | rs9939224   | 16  | 57002732  | CETP          | G            | 0.21 | 1.95E-10 | -2.37 (-3.10 - -1.65) |
| HDL       | rs11652616  | 17  | 48978368  | TOB1-AS1      | T            | 0.37 | 6.22E-07 | -1.56 (-2.18 - -0.95) |
| HDL       | rs143876112 | 20  | 34300387  | RBM39         | C            | 0.34 | 4.47E-07 | -0.51 (-0.83 - -0.37) |
| LDL       | rs1456465   | 1   | 2811814   | RP11-740P5.3  | G            | 0.16 | 4.68E-07 | -0.17 (-0.27 - -0.12) |
| LDL       | rs2606405   | 1   | 2821620   | RP11-740P5.3  | G            | 0.17 | 6.56E-07 | -0.17 (-0.28 - -0.12) |
| LDL       | rs2606406   | 1   | 2822146   | RP11-740P5.3  | G            | 0.16 | 9.15E-07 | -0.17 (-0.28 - -0.12) |
| LDL       | rs2842910   | 1   | 2817421   | RP11-740P5.3  | T            | 0.16 | 8.58E-07 | -0.17 (-0.29 - -0.12) |
| LDL       | rs2842911   | 1   | 2818633   | RP11-740P5.3  | G            | 0.16 | 9.20E-07 | -0.17 (-0.28 - -0.12) |
| LDL       | rs2842913   | 1   | 2819559   | RP11-740P5.3  | G            | 0.16 | 4.76E-07 | -0.17 (-0.27 - -0.12) |
| LDL       | rs2842914   | 1   | 2820972   | RP11-740P5.3  | G            | 0.16 | 4.13E-07 | -0.17 (-0.27 - -0.12) |
| LDL       | rs750786    | 1   | 2823316   | RP11-740P5.3  | C            | 0.16 | 6.16E-07 | -0.17 (-0.28 - -0.12) |
| LDL       | rs79316815  | 1   | 2819307   | RP11-740P5.3  | A            | 0.16 | 2.87E-07 | -0.16 (-0.26 - -0.12) |
| LDL       | rs897630    | 1   | 2823506   | RP11-740P5.3  | A            | 0.16 | 6.12E-07 | -0.17 (-0.28 - -0.12) |
| LDL       | rs7623486   | 3   | 69909094  | MITF          | A            | 0.19 | 9.07E-07 | 0.18 (0.13 - 0.30)    |
| LDL       | rs13108352  | 4   | 180420271 | RP11-404J23.1 | A            | 0.36 | 9.10E-07 | -0.22 (-0.37 - -0.16) |
| LDL       | rs1356790   | 4   | 180432281 | RP11-404J23.1 | T            | 0.36 | 7.46E-07 | -0.22 (-0.36 - -0.16) |
| LDL       | rs1455690   | 4   | 180419797 | RP11-404J23.1 | C            | 0.36 | 6.34E-07 | -0.22 (-0.36 - -0.16) |
| LDL       | rs2611040   | 4   | 180446850 | RP11-404J23.1 | C            | 0.34 | 9.32E-07 | 4.58 (2.75 - 6.41)    |
| LDL       | rs2716769   | 4   | 180470440 | RP11-404J23.1 | G            | 0.35 | 2.09E-07 | 4.83 (3.01 - 6.66)    |
| LDL       | rs3911609   | 4   | 180471670 | RP11-404J23.1 | T            | 0.34 | 4.09E-07 | -0.21 (-0.34 - -0.15) |
| LDL       | rs12705932  | 7   | 113627084 | PPP1R3A       | G            | 0.11 | 9.84E-07 | -0.14 (-0.24 - -0.10) |
| LDL       | rs11025103  | 11  | 19357204  | NAV2          | C            | 0.23 | 5.83E-07 | -0.19 (-0.31 - -0.14) |
| LDL       | rs4756996   | 11  | 19355480  | NAV2          | C            | 0.23 | 4.67E-07 | -0.19 (-0.31 - -0.14) |
| LDL       | rs12960731  | 18  | 23918273  | TAF4B         | C            | 0.04 | 7.66E-07 | 11.69 (7.06 - 16.31)  |

| Phenotype | SNP         | Chr | Position  | Nearest Gene  | Minor Allele | MAF  | P        | OR or Beta (95% CI)   |
|-----------|-------------|-----|-----------|---------------|--------------|------|----------|-----------------------|
| TC        | rs2168532   | 1   | 2817594   | RP11-740P5.3  | C            | 0.16 | 5.09E-07 | -0.18 (-0.29 - -0.13) |
| TC        | rs10909827  | 1   | 2805896   | RP11-740P5.3  | C            | 0.17 | 1.97E-07 | -0.17 (-0.27 - -0.12) |
| TC        | rs116320789 | 1   | 2812252   | RP11-740P5.3  | C            | 0.09 | 7.53E-07 | -0.14 (-0.23 - -0.10) |
| TC        | rs1456465   | 1   | 2811814   | RP11-740P5.3  | G            | 0.16 | 7.34E-08 | -0.16 (-0.26 - -0.12) |
| TC        | rs1456466   | 1   | 2811988   | RP11-740P5.3  | T            | 0.17 | 8.38E-07 | -0.18 (-0.30 - -0.13) |
| TC        | rs1456467   | 1   | 2812646   | RP11-740P5.3  | C            | 0.16 | 3.09E-07 | -0.17 (-0.28 - -0.13) |
| TC        | rs2606405   | 1   | 2821620   | RP11-740P5.3  | G            | 0.17 | 3.11E-07 | -0.18 (-0.28 - -0.13) |
| TC        | rs2606406   | 1   | 2822146   | RP11-740P5.3  | G            | 0.16 | 2.31E-07 | -0.17 (-0.28 - -0.13) |
| TC        | rs2842910   | 1   | 2817421   | RP11-740P5.3  | T            | 0.16 | 2.34E-07 | -0.17 (-0.28 - -0.13) |
| TC        | rs2842911   | 1   | 2818633   | RP11-740P5.3  | G            | 0.16 | 2.21E-07 | -0.17 (-0.28 - -0.13) |
| TC        | rs2842913   | 1   | 2819559   | RP11-740P5.3  | G            | 0.16 | 1.19E-07 | -0.17 (-0.27 - -0.12) |
| TC        | rs2842914   | 1   | 2820972   | RP11-740P5.3  | G            | 0.16 | 9.43E-08 | -0.17 (-0.26 - -0.12) |
| TC        | rs2842915   | 1   | 2821868   | RP11-740P5.3  | G            | 0.16 | 2.69E-07 | -0.17 (-0.28 - -0.13) |
| TC        | rs2842916   | 1   | 2822412   | RP11-740P5.3  | C            | 0.17 | 4.32E-07 | -0.18 (-0.29 - -0.13) |
| TC        | rs750786    | 1   | 2823316   | RP11-740P5.3  | C            | 0.16 | 1.82E-07 | -0.17 (-0.27 - -0.12) |
| TC        | rs79316815  | 1   | 2819307   | RP11-740P5.3  | A            | 0.16 | 7.62E-08 | -0.17 (-0.26 - -0.12) |
| TC        | rs897630    | 1   | 2823506   | RP11-740P5.3  | A            | 0.16 | 1.66E-07 | -0.17 (-0.27 - -0.12) |
| TC        | rs1568749   | 3   | 916082    | AC090044.2    | T            | 0.24 | 8.21E-07 | -0.18 (-0.30 - -0.13) |
| TC        | rs13109317  | 4   | 180444718 | RP11-404J23.1 | C            | 0.34 | 4.13E-07 | -0.22 (-0.37 - -0.16) |
| TC        | rs2035468   | 4   | 96289289  | UNC5C         | T            | 0.18 | 7.00E-07 | 0.19 (0.14 - 0.31)    |
| TC        | rs2611034   | 4   | 180448146 | RP11-404J23.1 | C            | 0.34 | 6.46E-07 | 4.36 (2.65 - 6.08)    |
| TC        | rs2611040   | 4   | 180446850 | RP11-404J23.1 | C            | 0.34 | 3.37E-07 | 4.48 (2.76 - 6.19)    |
| TC        | rs2621460   | 4   | 96287647  | UNC5C         | T            | 0.18 | 7.91E-07 | 0.19 (0.14 - 0.31)    |
| TC        | rs2626038   | 4   | 96287897  | UNC5C         | G            | 0.18 | 7.83E-07 | 0.19 (0.14 - 0.31)    |
| TC        | rs2626043   | 4   | 96289313  | UNC5C         | A            | 0.18 | 5.39E-07 | 0.19 (0.13 - 0.31)    |
| TC        | rs2626076   | 4   | 96289972  | UNC5C         | A            | 0.18 | 7.02E-07 | 0.19 (0.14 - 0.31)    |
| TC        | rs2716769   | 4   | 180470440 | RP11-404J23.1 | G            | 0.35 | 1.38E-07 | 4.62 (2.90 - 6.33)    |
| TC        | rs3911609   | 4   | 180471670 | RP11-404J23.1 | T            | 0.34 | 3.00E-07 | -0.22 (-0.36 - -0.16) |
| TC        | rs71571192  | 7   | 113670553 | PPP1R3A       | T            | 0.10 | 9.08E-07 | -0.14 (-0.24 - -0.10) |
| TC        | rs10217586  | 9   | 22121349  | CDKN2B-AS1    | T            | 0.47 | 4.80E-07 | 4.19 (2.56 - 5.81)    |
| TC        | rs1333045   | 9   | 22119195  | CDKN2B-AS1    | C            | 0.49 | 3.16E-07 | 4.24 (2.61 - 5.86)    |
